# Supplementary material
Source: PubMed Central journal article supplement (PMC3378209)
Supplement: NIHMS48395-supplement-01.pdf [file NIHMS48395-supplement-01.pdf]

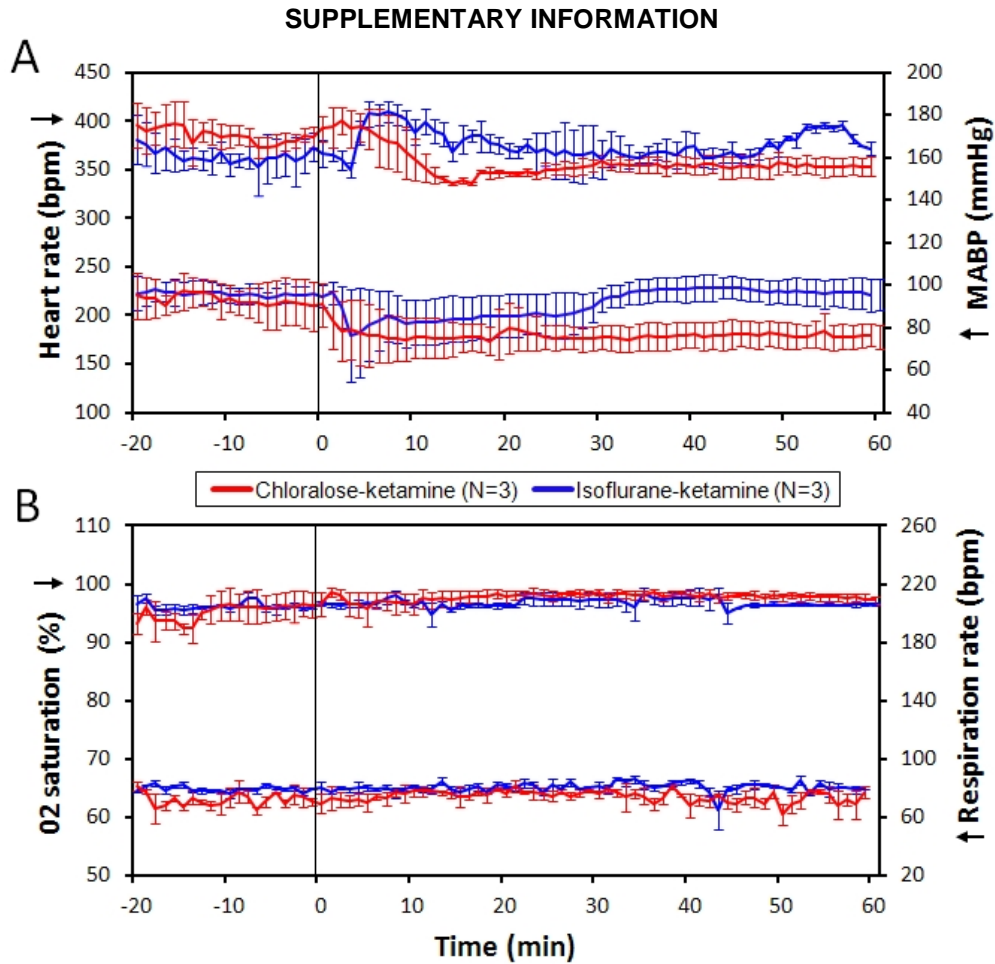

**Fig. S1.** Effects of anaesthesia on cardiovascular parameters following acute ketamine challenge.

Graphs indicate changes to heart rate/ MABP (A), respiration rate / percentage O<sub>2</sub> saturation (B) (mean ± SEM).

**Table S2.** Blood gas measurements performed prior to and after ketamine challenge.

|                                | Isoflurane anaesthesia |          | r-chloralose anaesthesia |          |
|--------------------------------|------------------------|----------|--------------------------|----------|
|                                | Baseline               | Post-ket | Baseline                 | Post-ket |
| P <sub>a</sub> CO <sub>2</sub> | 43±3                   | 46±17    | 46±6                     | 48±2     |
| P <sub>a</sub> O <sub>2</sub>  | 133±34                 | 134±61   | 169±26                   | 127±31   |

P<sub>a</sub>CO<sub>2</sub> / P<sub>a</sub>O<sub>2</sub> - partial pressure of arterial CO<sub>2</sub> / O<sub>2</sub> (mmHg)  
 Values presented as group mean ± SEM.

© 2012 Hodkinson et al.; This is an Open Access article distributed under the terms of the Creative Commons Attribution License (<http://creativecommons.org/licenses/by/3.0>), which permits unrestricted use, distribution, and reproduction in any medium, provided the original work is properly cited.
